# Supplementary material
Source: HighWire-hosted journal article supplement (http://www.qdcxjkg.com/highwire/filestream/114365/field_highwire_adjunct_files/9/ERJ_00588-2013_Wisbauer.pdf)
Supplement: ERJ_00588-2013_Wisbauer.pdf [file ERJ_00588-2013_Wisbauer.pdf]

Warnung: Dieses Formular wird in der aktuellen Version von Acrobat bzw. Adobe Reader nicht unterstützt.  
Zur vollständigen Unterstützung ist ein Upgrade auf die neueste Version erforderlich.
